# Supplementary material for: Accurate analysis of genuine CRISPR editing events with ampliCan
Source: HighWire-hosted journal article supplement (doi:10.1101/gr.244293.118), 2019-03-08
Supplement: Supplemental_Code_S1.zip [file 213ss_normalized.pdf › amplican_manuscript/figures/normalization/MiSeq_run9_2014_03_26/213ss_normalized.pdf]

Frame

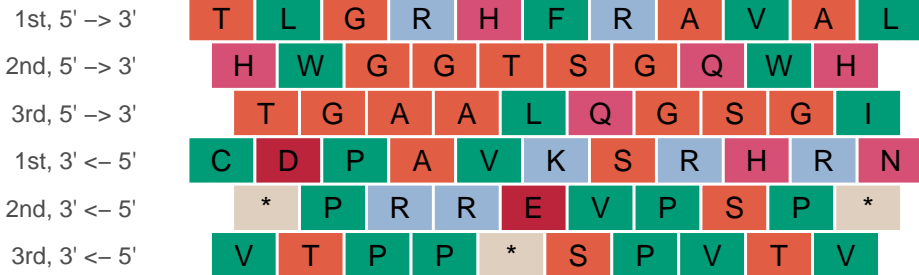

[%]

0 25 50 75 100

Match

76

Edited

10

F

14

amplicon

ACACTGGGGCGGCACCTTCAGGGCAGTGGCATTG

1

2

3

4

5

6

7

8

9

10

ACACTGGGGCGGCACCTT

ACACTGGGGCGGCACCTTCAG

ACACTGGGGCGGCACCTTCAGTGGCATTG

ACA

ACA

ACA

ACA

ACA

ACA

Relative Nucleotide Position

| Freq | Count | F    |
|------|-------|------|
| 0.76 | 4918  | 0    |
| 0.05 | 316   | -180 |
| 0.02 | 131   | -5   |
| 0.01 | 88    | -6   |
| 0.01 | 75    | -137 |
| 0.01 | 71    | -39  |
| 0.01 | 57    | -103 |
| 0.01 | 44    | -176 |
| 0.01 | 33    | -19  |
| 0.01 | 33    | -177 |
| 0    | 31    | -172 |

0

10

20

213ss
