# Supplementary material for: Accurate analysis of genuine CRISPR editing events with ampliCan
Source: HighWire-hosted journal article supplement (doi:10.1101/gr.244293.118), 2019-03-08
Supplement: Supplemental_Code_S1.zip [file GFPnoSTOP_gRNA-_normalized.pdf › amplican_manuscript/figures/normalization/MiSeq_run9_2014_03_26/GFPnoSTOP_gRNA-_normalized.pdf]

Frame

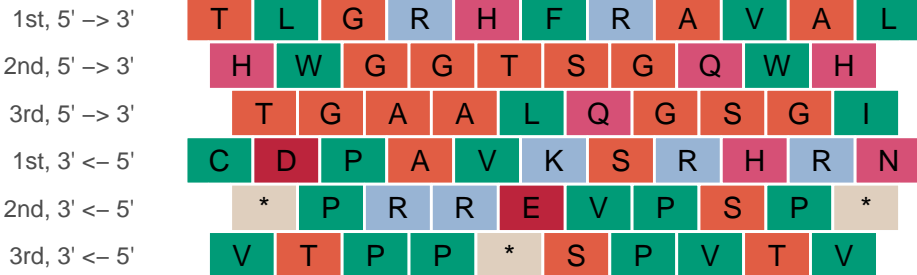

[%]

0 25 50 75 100

Match

82

Edited

12

F

6

amplicon

ACACTGGGGCGGCACCTTCAGGGCAGTGGCATTG

1

2

3

4

5

6

7

8

9

10

ACACTGGGGCGGCACCTTCAGGGCATTG

GCTCTTCCGATCTGTCGC

0

10

20

Relative Nucleotide Position

Freq

Count

F

0.82

4767

0

0.05

272

-183

0.04

223

-126

0.03

152

-141

0.01

57

-137

0.01

42

-217

0

27

-176

0

24

-172

0

16

-169

0

9

-6

0

7

-187
