# Supplementary material for: Accurate analysis of genuine CRISPR editing events with ampliCan
Source: HighWire-hosted journal article supplement (doi:10.1101/gr.244293.118), 2019-03-08
Supplement: Supplemental_Code_S1.zip [file GFPnoSTOP_raw.pdf › amplican_manuscript/figures/normalization/MiSeq_run9_2014_03_26/GFPnoSTOP_raw.pdf]

Frame

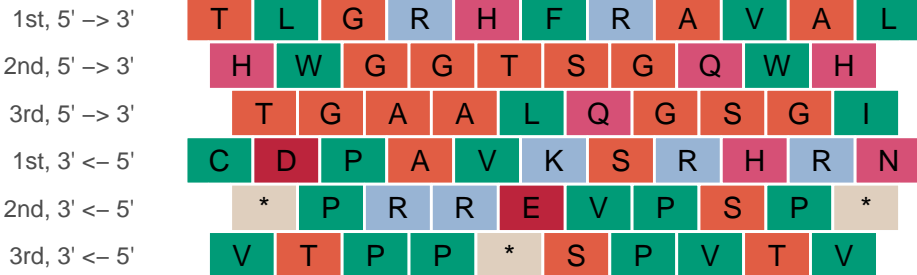

[%]

0 25 50 75 100

Match

19

Edited

12

F

69

amplicon

ACACTGGGGCGGCACTTCAGGGCAGTGGCATTG

1

2

3

4

5

6

7

8

9

10

ACACTGGGGCGGCACTTCAGTGGCATTG

ACACTGGGGCGGCACTTCAGTGGCATTG

0

10

20

Relative Nucleotide Position

Freq

Count

F

0.18

615

0

0.55

1847

-194

0.03

94

-174

0.03

92

-5

0.03

89

-6

0.01

33

-176

0.01

32

-137

0.01

31

-38

0.01

27

-192

0.01

20

-117

0.01

19

-30
