# Supplementary material for: Accurate analysis of genuine CRISPR editing events with ampliCan
Source: HighWire-hosted journal article supplement (doi:10.1101/gr.244293.118), 2019-03-08
Supplement: Supplemental_Code_S1.zip [file Injected_cartb_control.pdf › amplican_manuscript/figures/normalization/MiSeq_run1/Injected_cartb_control.pdf]

Frame

Uninjected\_NP008

1st, 5' → 3'

2nd, 5' → 3'

3rd, 5' → 3'

1st, 3' ← 5'

2nd, 3' ← 5'

3rd, 3' ← 5'

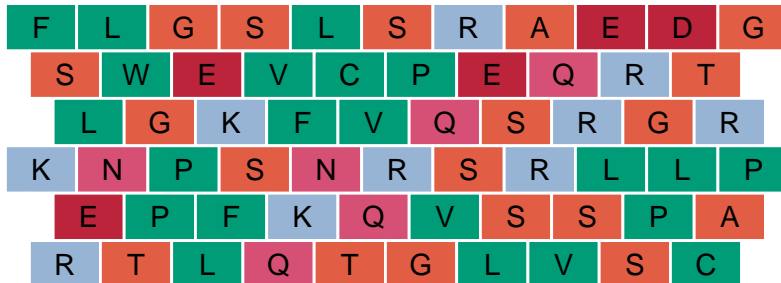

[ % ]

0 25 50 75 100

Match

Edited

F

100

0

0

amplicon

1

2

3

4

5

6

7

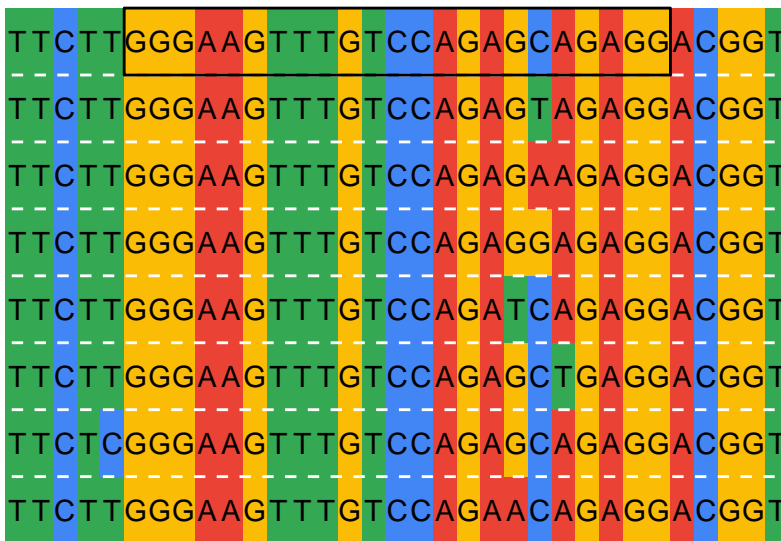

0

10

20

Relative Nucleotide Position

Freq

Count

F

0.86

2888

0

0.07

248

0

0.04

138

0

0.03

86

0

0

2

0

0

2

0

0

1

0

0

1

0
