# Supplementary material for: Accurate analysis of genuine CRISPR editing events with ampliCan
Source: HighWire-hosted journal article supplement (doi:10.1101/gr.244293.118), 2019-03-08
Supplement: Supplemental_Code_S1.zip [file Injected_fgf13b_normalized.pdf › amplican_manuscript/figures/normalization/MiSeq_run1/Injected_fgf13b_normalized.pdf]

Frame

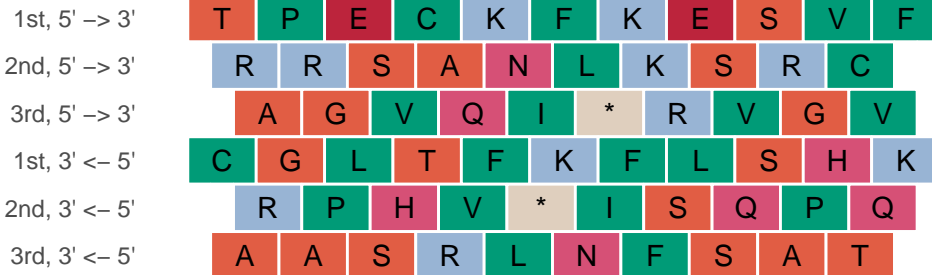[ % ]  
0 25 50 75 100

Match 52

Edited 8

F 41

amplicon

ACGCCGGAGTGCAAAATTTAAAGAGTCTGGTGTGTTT

1

2

3

4

5

6

7

8

9

10

ACGCCGGAGCTCCAAT

GAGTGCAAAATTTAAAGAGTCTGGTGTGTTT

ACGCCGGAGTGCAAAATTTAAAGAGTCTGGTGTGTTT

ACGCCGGAGCTCCAGT

0

10

20

Relative Nucleotide Position

| Freq | Count | F   |
|------|-------|-----|
| 0.52 | 295   | 0   |
| 0.31 | 179   | -67 |
| 0.02 | 14    | 0   |
| 0.02 | 9     | -12 |
| 0.01 | 5     | -65 |
| 0.01 | 5     | -70 |
| 0.01 | 5     | -59 |
| 0.01 | 3     | -40 |
| 0.01 | 3     | -22 |
| 0.01 | 3     | 75  |
| 0.01 | 3     | -37 |

Injected\_fgf13b
