# Supplementary material for: Accurate analysis of genuine CRISPR editing events with ampliCan
Source: HighWire-hosted journal article supplement (doi:10.1101/gr.244293.118), 2019-03-08
Supplement: Supplemental_Code_S1.zip [file Injected_NC1b_megamind_control.pdf › amplican_manuscript/figures/normalization/MiSeq_run1/Injected_NC1b_megamind_control.pdf]

Frame

Uninjected\_NC1b\_megamind

1st, 5' → 3'

2nd, 5' → 3'

3rd, 5' → 3'

1st, 3' ← 5'

2nd, 3' ← 5'

3rd, 3' ← 5'

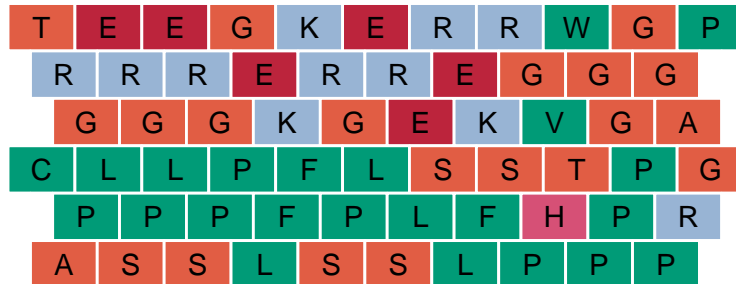

[ % ]

|        |    |
|--------|----|
| Match  | 99 |
| Edited | 0  |
| F      | 1  |

amplicon

1

2

3

4

5

6

7

8

9

10

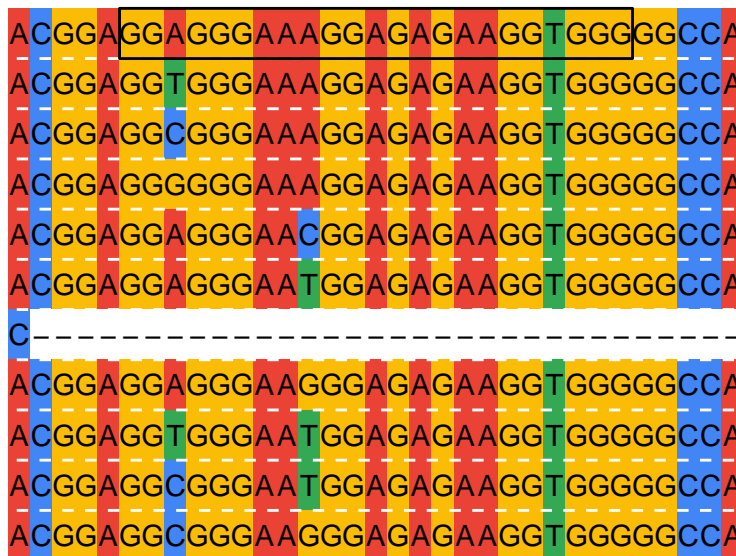

0 10 20

Relative Nucleotide Position

| Freq | Count | F    |
|------|-------|------|
| 0.75 | 1894  | 0    |
| 0.09 | 225   | 0    |
| 0.06 | 146   | 0    |
| 0.01 | 28    | 0    |
| 0.01 | 26    | 0    |
| 0.01 | 26    | 0    |
| 0.01 | 25    | -100 |
| 0.01 | 19    | 0    |
| 0    | 10    | 0    |
| 0    | 9     | 0    |
| 0    | 5     | 0    |
