# Supplementary material for: Accurate analysis of genuine CRISPR editing events with ampliCan
Source: HighWire-hosted journal article supplement (doi:10.1101/gr.244293.118), 2019-03-08
Supplement: Supplemental_Code_S1.zip [file Injected_NP005_control.pdf › amplican_manuscript/figures/normalization/MiSeq_run1/Injected_NP005_control.pdf]

Frame

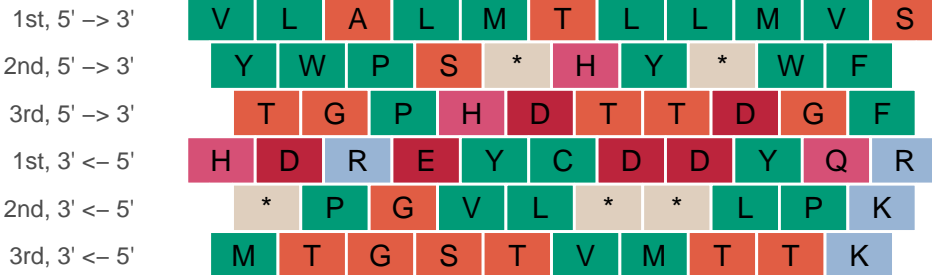

[ % ]

0 25 50 75 100

Match

84

Edited

3

F

13

amplicon

GTACTGGCCCTCATGACACTACTGATGGTTTCT

1

2

3

4

5

6

7

8

9

10

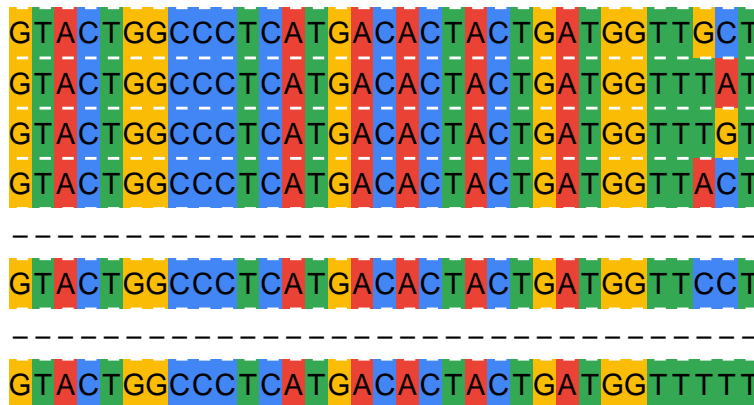

| Freq | Count | F   |
|------|-------|-----|
| 0.59 | 2439  | 0   |
| 0.07 | 310   | -83 |
| 0.06 | 264   | 0   |
| 0.05 | 213   | 0   |
| 0.05 | 209   | 0   |
| 0.03 | 124   | 0   |
| 0.02 | 67    | -83 |
| 0.01 | 44    | 0   |
| 0.01 | 44    | -63 |
| 0.01 | 36    | 0   |
| 0.01 | 32    | -72 |

0

10

20

Relative Nucleotide Position

Uninjected\_NP005
