# Supplementary material for: Accurate analysis of genuine CRISPR editing events with ampliCan
Source: HighWire-hosted journal article supplement (doi:10.1101/gr.244293.118), 2019-03-08
Supplement: Supplemental_Code_S1.zip [file Injected_SP18_control.pdf › amplican_manuscript/figures/normalization/MiSeq_run1/Injected_SP18_control.pdf]

Frame

Uninjected\_SP18

1st, 5' → 3'

2nd, 5' → 3'

3rd, 5' → 3'

1st, 3' ← 5'

2nd, 3' ← 5'

3rd, 3' ← 5'

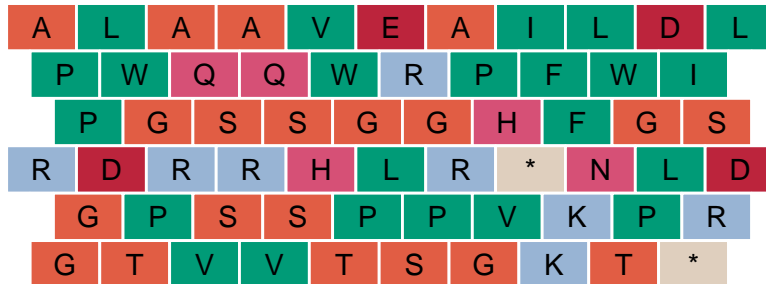

[ % ]

0 25 50 75 100

Match

98

Edited

2

F

0

amplicon

1

2

3

4

5

6

7

8

9

10

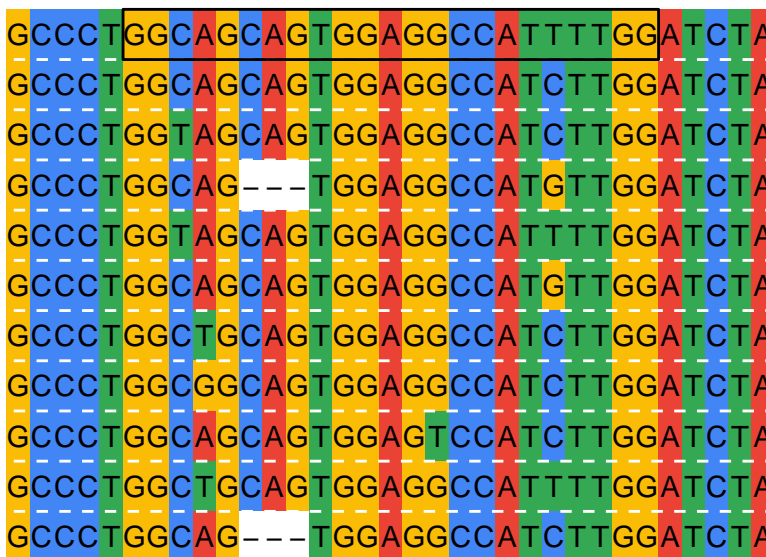

0

10

20

Relative Nucleotide Position

| Freq | Count | F  |
|------|-------|----|
| 0.21 | 1009  | 0  |
| 0.67 | 3148  | 0  |
| 0.04 | 183   | 0  |
| 0.02 | 84    | -3 |
| 0.01 | 38    | 0  |
| 0.01 | 28    | 0  |
| 0.01 | 25    | 0  |
| 0    | 15    | 0  |
| 0    | 12    | 0  |
| 0    | 11    | 0  |
| 0    | 10    | -3 |
