# Supplementary material for: Accurate analysis of genuine CRISPR editing events with ampliCan
Source: HighWire-hosted journal article supplement (doi:10.1101/gr.244293.118), 2019-03-08
Supplement: Supplemental_Code_S1.zip [file Injected_SP18_raw.pdf › amplican_manuscript/figures/normalization/MiSeq_run1/Injected_SP18_raw.pdf]

Frame

Injected\_SP18

1st, 5' → 3'

2nd, 5' → 3'

3rd, 5' → 3'

1st, 3' ← 5'

2nd, 3' ← 5'

3rd, 3' ← 5'

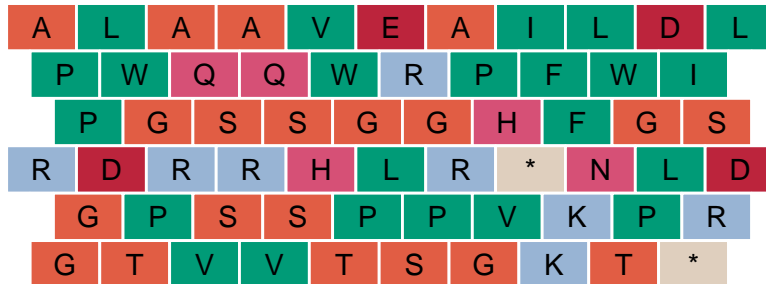

[ % ]

0 25 50 75 100

Match

94

Edited

3

F

3

amplicon

1

2

3

4

5

6

7

8

9

10

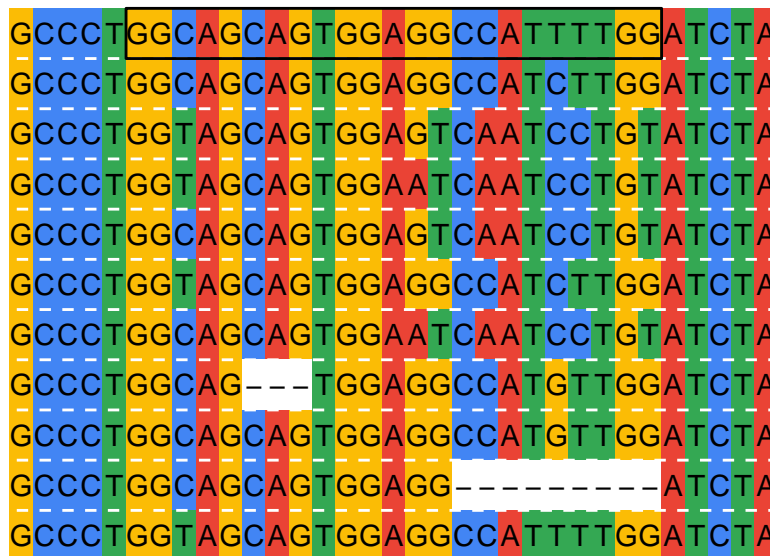

0

10

20

Relative Nucleotide Position

| Freq | Count | F  |
|------|-------|----|
| 0.13 | 722   | 0  |
| 0.46 | 2632  | 0  |
| 0.16 | 938   | 0  |
| 0.09 | 489   | 0  |
| 0.03 | 171   | 0  |
| 0.02 | 101   | 0  |
| 0.01 | 64    | 0  |
| 0.01 | 61    | -3 |
| 0.01 | 35    | 0  |
| 0.01 | 32    | -9 |
| 0.01 | 29    | 0  |
