# Supplementary material for: Accurate analysis of genuine CRISPR editing events with ampliCan
Source: HighWire-hosted journal article supplement (doi:10.1101/gr.244293.118), 2019-03-08
Supplement: Supplemental_Code_S1.zip [file Injected_Toddler_u1_1_normalized.pdf › amplican_manuscript/figures/normalization/MiSeq_run5_2013_09_25/Injected_Toddler_u1_1_normalized.pdf]

Frame

Injected\_Toddler\_u1\_1

1st, 5' → 3'

2nd, 5' → 3'

3rd, 5' → 3'

1st, 3' ← 5'

2nd, 3' ← 5'

3rd, 3' ← 5'

amplicon

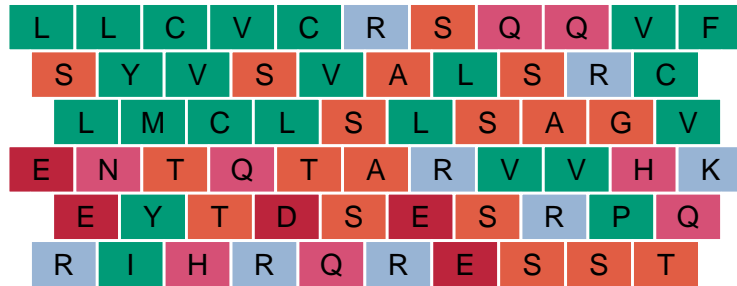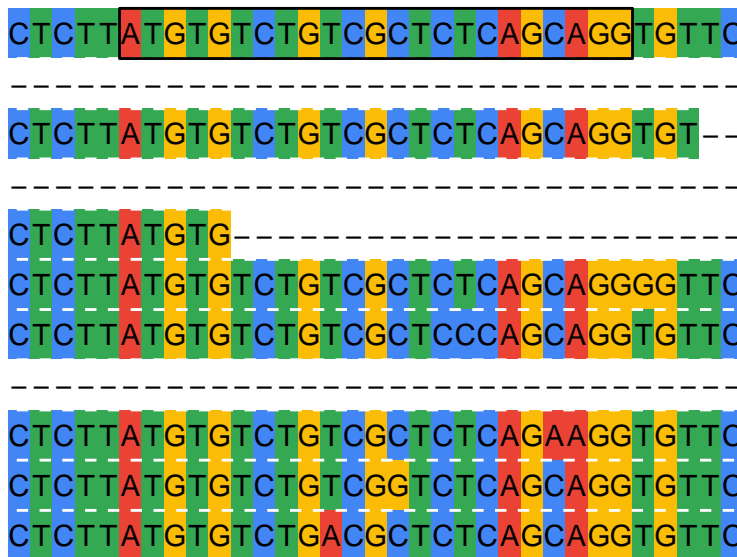

0

10

20

Relative Nucleotide Position

[ % ]

0 25 50 75 100

Match

Edited

F

99

0

1

Freq

Count

F

0.98

1886

0

0

6

-137

0

4

-88

0

3

-123

0

3

-107

0

2

0

0

2

0

0

2

-37

0

1

0

0

1

0

0

1

0
