# Supplementary material for: Accurate analysis of genuine CRISPR editing events with ampliCan
Source: HighWire-hosted journal article supplement (doi:10.1101/gr.244293.118), 2019-03-08
Supplement: Supplemental_Code_S1.zip [file invit96ss_raw.pdf › amplican_manuscript/figures/normalization/MiSeq_run9_2014_03_26/invit96ss_raw.pdf]

Frame

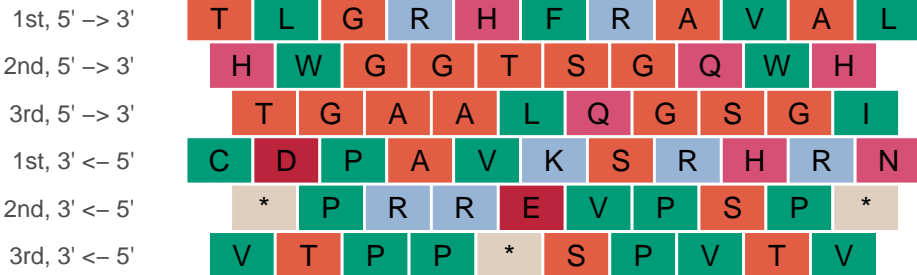

amplicon

ACACTGGGGCGGCACTTCAGGGCAGTGGCATTG

1

2

3

4

5

6

7

8

9

10

invit96ss

Relative Nucleotide Position

[%]

0 25 50 75 100

Match

9

Edited

26

F

65

Freq

Count

F

0.08

812

0

0.4

3852

-194

0.13

1275

-111

0.04

419

-155

0.03

305

-183

0.03

290

-79

0.03

252

-154

0.02

212

-188

0.02

201

-112

0.02

199

-174

0.02

196

-117
