# Supplementary material for: Accurate analysis of genuine CRISPR editing events with ampliCan
Source: HighWire-hosted journal article supplement (doi:10.1101/gr.244293.118), 2019-03-08
Supplement: Supplemental_Code_S1.zip [file old_g118_1_control.pdf › amplican_manuscript/figures/normalization/MiSeq_run8_2014_01_30/old_g118_1_control.pdf]

Frame

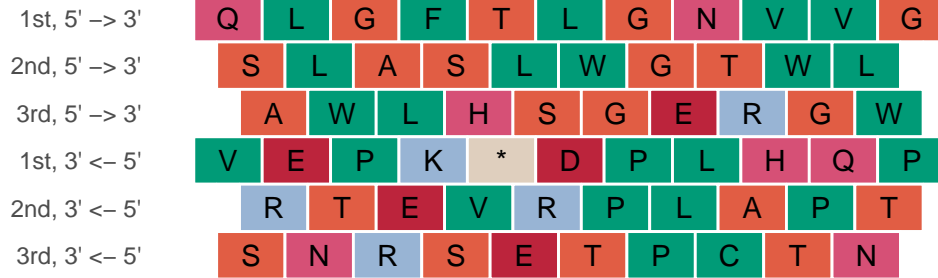[ % ]  
0 25 50 75 100

Match

95

Edited

4

F

0

amplicon

CAGCTTGGCTTCACTCTGGGGAACGTGGTTGGC

1

2

3

4

5

6

7

8

9

10

un\_5

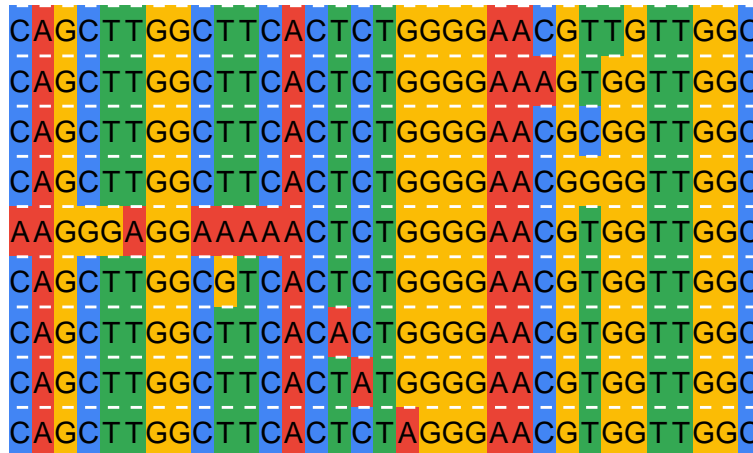

0

10

20

Relative Nucleotide Position

| Freq | Count | F   |
|------|-------|-----|
| 0.92 | 591   | 0   |
| 0.04 | 28    | -51 |
| 0    | 3     | 0   |
| 0    | 2     | 0   |
| 0    | 2     | 0   |
| 0    | 2     | 0   |
| 0    | 1     | 0   |
| 0    | 1     | 0   |
| 0    | 1     | 0   |
| 0    | 1     | 0   |
