# Supplementary material for: Accurate analysis of genuine CRISPR editing events with ampliCan
Source: HighWire-hosted journal article supplement (doi:10.1101/gr.244293.118), 2019-03-08
Supplement: Supplemental_Code_S1.zip [file SP1_inj_control.pdf › amplican_manuscript/figures/normalization/MiSeq_run7_2014_01_02/SP1_inj_control.pdf]

Frame

SP1\_uninj

1st, 5' → 3'

2nd, 5' → 3'

3rd, 5' → 3'

1st, 3' ← 5'

2nd, 3' ← 5'

3rd, 3' ← 5'

amplicon

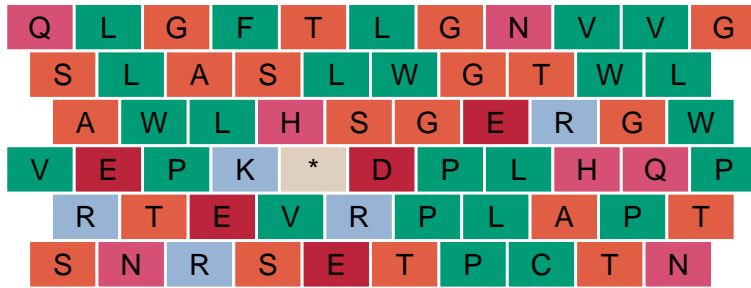

CAGCTTGGCTTCACTCTGGGGAACGTGGTTGGC

1

2

3

4

5

6

7

8

9

10

0

10

20

Relative Nucleotide Position

[ % ]

0 25 50 75 100

Match

0

Edited

98

F

2

Freq

Count

F

0

0

0

0.94

5329

-51

0.02

131

-84

0.02

101

-97

0.01

30

-36

0

22

-85

0

12

-84

0

8

-84

0

3

-65

0

3

-47

0

2

-52
