# Supplementary material for: Accurate analysis of genuine CRISPR editing events with ampliCan
Source: HighWire-hosted journal article supplement (doi:10.1101/gr.244293.118), 2019-03-08
Supplement: Supplemental_Code_S1.zip [file SP1_inj_raw.pdf › amplican_manuscript/figures/normalization/MiSeq_run7_2014_01_02/SP1_inj_raw.pdf]

Frame

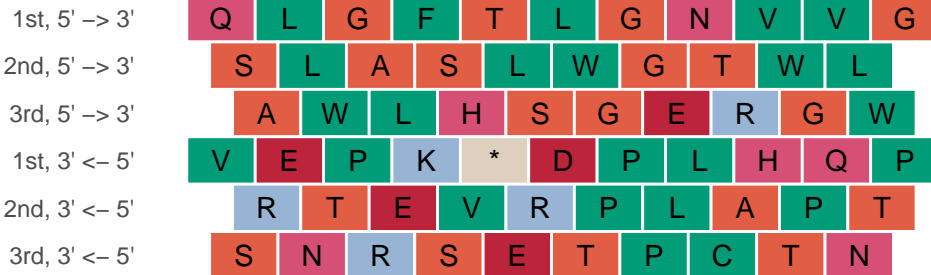

amplicon

CAGCTTGGCTTCACTCTGGGGAACGTGGTTGGC

SP1\_inj

1

2

3

4

5

6

7

8

9

10

0

10

20

Relative Nucleotide Position

[%]

0 25 50 75 100

Match

0

Edited

80

F

20

Freq

Count

F

0

0

0

0.74

9930

-51

0.18

2465

-47

0.05

718

-84

0.01

129

-52

0

55

-97

0

29

-84

0

22

-65

0

13

-36

0

7

-85

0

6

-84
