# Supplementary material for: Accurate analysis of genuine CRISPR editing events with ampliCan
Source: HighWire-hosted journal article supplement (doi:10.1101/gr.244293.118), 2019-03-08
Supplement: Supplemental_Code_S1.zip [file spaw-lnc_e1_1_inj_control.pdf › amplican_manuscript/figures/normalization/MiSeq_run7_2014_01_02/spaw-lnc_e1_1_inj_control.pdf]

Frame

spaw-inc\_e1\_1\_uninj

1st, 5' → 3'

2nd, 5' → 3'

3rd, 5' → 3'

1st, 3' ← 5'

2nd, 3' ← 5'

3rd, 3' ← 5'

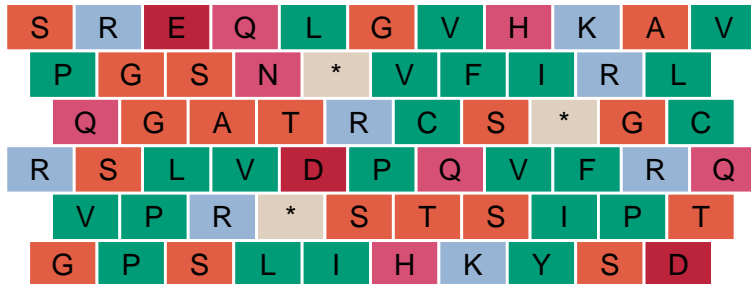

amplicon

1

2

3

4

5

6

7

8

9

10

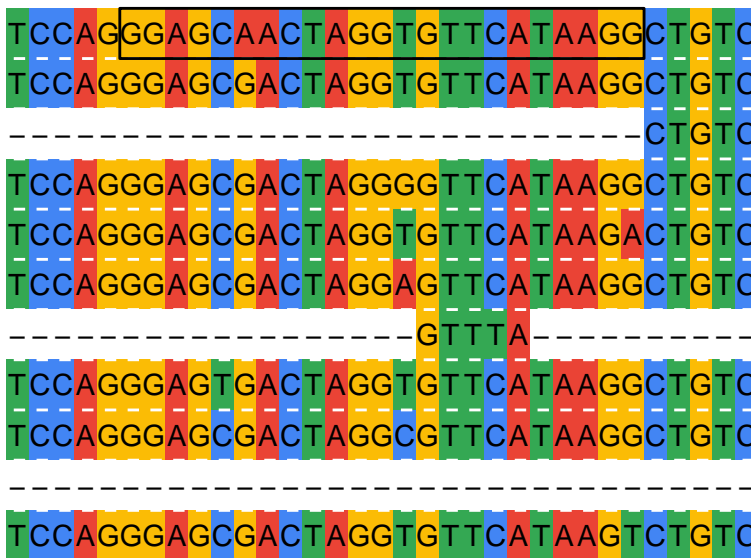

0

10

20

Relative Nucleotide Position

[ % ]

0 25 50 75 100

Match

99

Edited

0

F

1

Freq

Count

F

0.01

22

0

0.95

2448

0

0

12

-58

0

8

0

0

5

0

0

5

0

0

4

-58

0

4

0

0

4

0

0

3

-68

0

3

0
